# Supplementary material
Source: publisher figshare collection journal article supplement (https://gsapubs.figshare.com/ndownloader/files/22741847)
Supplement: Supplementary file 1 [file 22741847]

TABLE A. Apatite and zircon data from central Laramie Mountains shear zone

| Sample name                                          | Wt<br>(mg) | U<br>(ppm) | Tot Pb<br>(ppm) | com Pb<br>(ppm) | <u>206Pb*</u><br>204Pb | <u>206Pb</u><br>238U | <u>207Pb</u><br>235U | <u>207Pb</u><br>206Pb | age (Ma)             |                      |                       | Intercept w/<br>100 Ma lower |
|------------------------------------------------------|------------|------------|-----------------|-----------------|------------------------|----------------------|----------------------|-----------------------|----------------------|----------------------|-----------------------|------------------------------|
|                                                      |            |            |                 |                 |                        |                      |                      |                       | <u>206Pb</u><br>238U | <u>207Pb</u><br>235U | <u>207Pb</u><br>206Pb |                              |
| Northwest of Cottonwood Park and Garrett shear zones |            |            |                 |                 |                        |                      |                      |                       |                      |                      |                       |                              |
| WY 70-86 apat I                                      | 23.26      | 6.5        | 4.9             | 1.4             | 117.7                  | 0.389822             | 7.11407              | 0.132358              | 2122                 | 2126                 | 2129.5 ± 24           | 2130 ± 20                    |
| WY 70-86 apat II                                     | 14.64      | 10         | 7.4             | 2.1             | 115.8                  | 0.379578             | 6.95100              | 0.132814              | 2074                 | 2105                 | 2135.5 ± 23           | 2137 ± 19                    |
| LR-37 apat I                                         | 7.61       | 7.1        | 6.8             | 2.7             | 63.2                   | 0.328716             | 6.34147              | 0.139916              | 1832                 | 2024                 | 2226.2 ± 47           | 2238 ± 37                    |
| WY 70-86 d-1 z                                       | 0.138      | 560.6      | 244.6           | 6.9             | 1725.3                 | 0.387004             | 9.30718              | 0.174422              | 2109                 | 2369                 | 2600.5 ± 1.6          | 2612 ± 1.1                   |
| Southeast of Cottonwood Park and Garrett shear zones |            |            |                 |                 |                        |                      |                      |                       |                      |                      |                       |                              |
| LR-21 apat I                                         | 17.52      | 3.4        | 3.1             | 1.8             | 47.0                   | 0.288279             | 4.42026              | 0.111207              | 1633                 | 1716                 | 1819.2 ± 75           | 1826 ± 76                    |
| LR-22 apat I                                         | 8.23       | 6.9        | 3.7             | 1.4             | 93.8                   | 0.289013             | 4.44191              | 0.111468              | 1637                 | 1720                 | 1823.5 ± 31           | 1831 ± 31                    |
| LR-23 apat II                                        | 13.52      | 11.4       | 6.2             | 3.1             | 71.1                   | 0.263308             | 4.00052              | 0.110192              | 1507                 | 1634                 | 1802.6 ± 41           | 1815 ± 42                    |
| LR-31 apat I                                         | 14.09      | 18.1       | 10.1            | 4.6             | 86.1                   | 0.307579             | 4.69333              | 0.110668              | 1729                 | 1766                 | 1810.4 ± 36           | 1813 ± 37                    |
| LR-32 apat I                                         | 11.57      | 25.7       | 11.8            | 4               | 122.4                  | 0.304552             | 4.57591              | 0.108972              | 1714                 | 1745                 | 1782.3 ± 24           | 1785 ± 25                    |
| LR-21 d-1 zircon                                     | 0.194      | 294.7      | 154.5           | 6.7             | 1052.1                 | 0.430282             | 10.27580             | 0.173205              | 2307                 | 2460                 | 2588.9 ± 2.4          | 2595 ± 1.5                   |
| LR-22 d-1 zircon                                     | 0.173      | 173.2      | 77.2            | 2.4             | 1587.9                 | 0.395202             | 9.75473              | 0.179017              | 2147                 | 2412                 | 2643.8 ± 2.0          | 2654 ± 1.3                   |
| LR-23 nm10-A z                                       | 0.037      | 243.6      | 123.0           | 8.6             | 709.9                  | 0.448923             | 10.80750             | 0.174603              | 2390                 | 2507                 | 2597.9 ± 2.7          | 2602 ± 2.8                   |

\* 206Pb/204Pb corrected for blank.

#### NOTES:

Isotopic compositions for common Pb correction of apatite data came from analysis of coexisting alkali feldspar.

Magnetic susceptibility of zircon fractions indicated by degree for diamagnetic (d) and paramagnetic (nm) configuration of Franz barrier magnetic separator.

A = air-abraded fraction.

#### ANALYTICAL PROCEDURES

Heavy minerals were concentrated from crushed samples by standard density and magnetic separation procedures. Apatite samples were dissolved in 800 µl 6N HCl in capped, screw top teflon beakers. Zircon samples were dissolved in 100 µl concentrated HF in teflon microbombs after Parrish (1987). Alkali feldspars were dissolved by steps in 5% HF after Ludwig and Silver (1978). Aliquots of apatite and zircon samples were spiked with a mixed <sup>235</sup>U/<sup>208</sup>Pb spike. Pb and U were purified from zircon samples on anion exchange columns using HCl chemistry modified from Krogh (1973). An HCl-HBr chemistry after Tilton (1973) was used to purify Pb from apatite and feldspar samples. U from apatites was purified from the HBr washes by using the same HCl chemistry as for zircon samples. Laboratory Pb and U blanks during the period of this research averaged 100 pg and 5 pg, respectively, for apatite and 70 pg and 5 pg for zircon. Pb and U samples were loaded onto single rhenium filaments for isotopic analysis by thermal emission mass spectrometry. The H<sub>3</sub>PO<sub>4</sub>-silica gel technique was used for Pb. U samples were loaded with H<sub>3</sub>PO<sub>4</sub> and graphite and run as metal ions. The samples were analysed isotopically at the Massachusetts Institute of Technology on a VG Sector 54 with multiple collectors. Mass discrimination factors for Pb and U were determined by multiple analyses of NBS SRM 981 and U-500, respectively, and were 0.124 ± .04%/amu for Pb and 0 ± .04%/amu for U. PBDAT by Ludwig (1988a) was used to reduce the raw mass spectrometer data, correct for blanks, and calculate uncertainties. Isotopic compositions for common Pb corrections of apatite data came from analyses of the least radiogenic step of coexisting alkali feldspars. Radiogenic Pb/U uncertainties (2 sigma) ranged from 0.5 to 2.5% for apatite data, and were approximately 0.47% for zircon data. Concordia intercepts were calculated by ISOPLOT (Ludwig 1988b).

Krogh, T.E., 1973, A low contamination method for hydrothermal decomposition of zircon and extraction of U and Pb for isotopic age determination: *Geochim. Cosmochim. Acta*, v. 37, p. 488-494.

Ludwig, K.R., 1988a, PBDAT for MS-DOS, a computer program for IBM-PC compatibles for processing raw Pb-U-Th isotope data, version 1.03, U.S. Geological Survey, Open-File Report 88-542

Ludwig, K.R., 1988b, ISOPLOT for MS-DOS, a plotting and regression program for radiogenic-isotope data, for IBM-PC compatible computers, version 1.04, U.S. Geological Survey, Open-File Report 88-557

Ludwig, K.R., and Silver, L.T., 1977, Lead isotope inhomogeneity in Precambrian K-feldspars: *Geochimica et Cosmochimica Acta*, v. 41, p. 1457-1471.

Parrish, R.R., 1987, An improved micro-capsule for zircon dissolution in U-Pb geochronology: *Isotope Geoscience*: v. 66, p. 99-102.

Tilton, G.R., 1973, Isotopic lead ages of chondritic meteorites: *Earth and Planetary Science Letters*, v. 19, p. 321-329.
